# Supplementary material for: Structural analysis of platelet fragments and extracellular vesicles produced by apheresis platelets during storage
Source: PubMed Central journal article supplement — Blood Adv. 2023 Nov 17;8(1):207–18. doi: 10.1182/bloodadvances.2023011325 (PMC10787271; doi:10.1182/bloodadvances.2023011325), 2023-11-17
Supplement: BLOODA_ADV-2023-011325-mmc1.pdf [file BLOODA_ADV-2023-011325-mmc1.pdf]

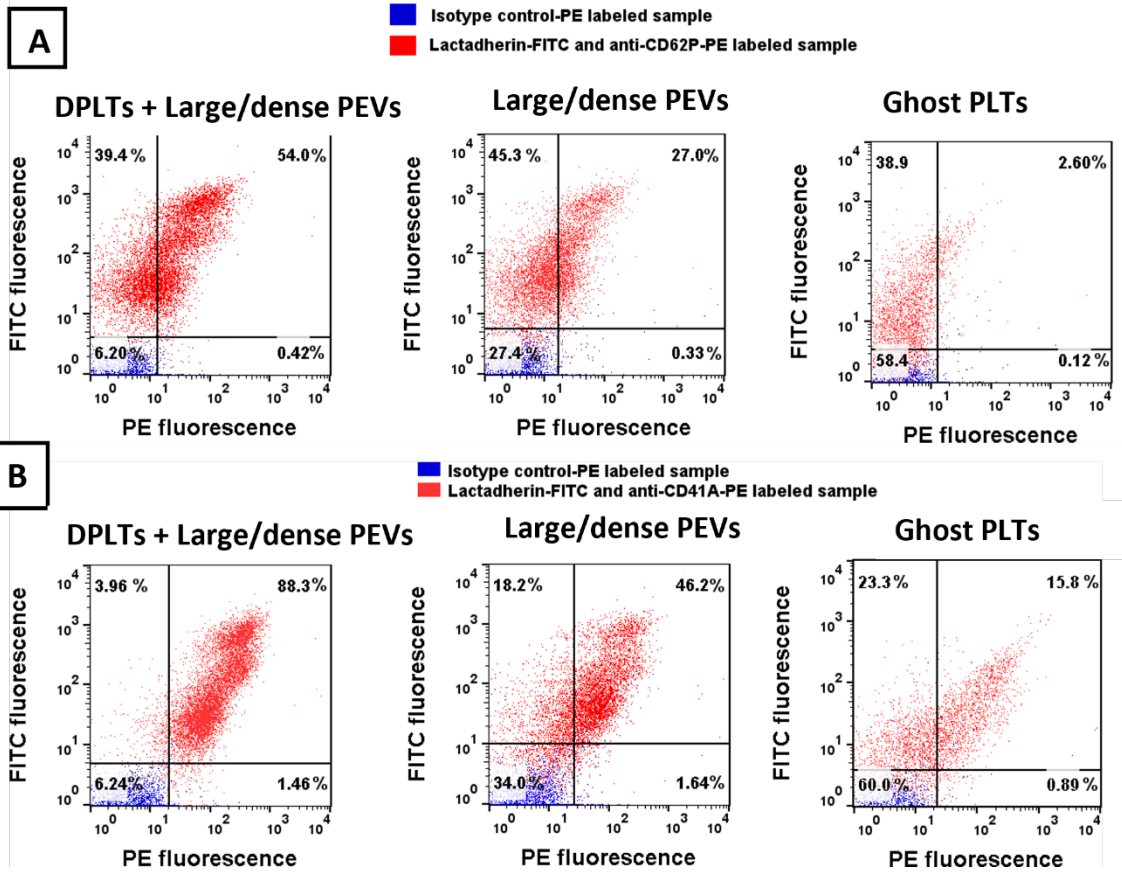

Figure S1. FC analysis of PSLP populations isolated by sucrose gradient. Representative scatter plots for PS<sup>+</sup>CD62P<sup>+</sup> PSLPs (A) and PS<sup>+</sup>CD41a<sup>+</sup> PSLPs.
